# Supplementary material for: Emergency and surgery services of primary hospitals in the United Republic of Tanzania
Source: PubMed Central journal article supplement — BMJ Open. 2012 Feb 3;2(1):e000369. doi: 10.1136/bmjopen-2011-000369 (PMC3274714; doi:10.1136/bmjopen-2011-000369), 2012-02-03
Supplement: bmjopen-2011-000369-s1.pdf [file bmjopen-2011-000369-s1.pdf]

"Thank you Dr Gosselin and Dr Silimperi for your comments. We agree with their suggestions and incorporated what we felt was appropriate for the scope of the paper. Dr Gosselin's reference was indeed incorrect and has been fixed. Dr Silimperi raised some very relevant points about the short-comings of the paper. We appreciated her suggestion about data ranges and we have included those ranges in the paper. Regarding participants medical qualifications, this highlights one of the great challenges of medical research in developing countries, the fact that every nation and region has different qualifications. All our on-site visits were performed by a licensed "western" physician (USA, Canada or Western Europe) or a local licensed physician. Plus, the survey tool was not designed to require an MD to complete, so we feel our survey personnel were adequate."
