# Supplementary material for: Emergency and surgery services of primary hospitals in the United Republic of Tanzania
Source: PubMed Central journal article supplement — BMJ Open. 2012 Feb 3;2(1):e000369. doi: 10.1136/bmjopen-2011-000369 (PMC3274714; doi:10.1136/bmjopen-2011-000369), 2012-02-03
Supplement: bmjopen-2011-000369.draft_revisions.pdf [file bmjopen-2011-000369.draft_revisions.pdf]

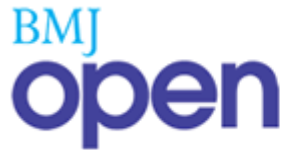

**A COMPREHENSIVE ON-SITE EVALUATION OF EMERGENCY  
AND SURGERY SERVICES OF PRIMARY HOSPITALS IN THE  
UNITED REPUBLIC OF TANZANIA**

|                                 |                                                                                                                                                                                                                                                                                                                                                                                                                                                                                                                                                         |
|---------------------------------|---------------------------------------------------------------------------------------------------------------------------------------------------------------------------------------------------------------------------------------------------------------------------------------------------------------------------------------------------------------------------------------------------------------------------------------------------------------------------------------------------------------------------------------------------------|
| Journal:                        | <i>BMJ Open</i>                                                                                                                                                                                                                                                                                                                                                                                                                                                                                                                                         |
| Manuscript ID:                  | bmjopen-2011-000369                                                                                                                                                                                                                                                                                                                                                                                                                                                                                                                                     |
| Article Type:                   | Research                                                                                                                                                                                                                                                                                                                                                                                                                                                                                                                                                |
| Date Submitted by the Author:   | 06-Oct-2011                                                                                                                                                                                                                                                                                                                                                                                                                                                                                                                                             |
| Complete List of Authors:       | Penoyar, Tom; World Health Organization, Emergency and Essential Surgical Care<br>Cohen, Hillary; Maimonides Medical Center<br>Kibatala, P; WHO Country Office<br>Magoda, A; St Francis Designated District Hospital<br>Saguti, G; WHO Country Office<br>Noel, L; World Health Organization, Emergency and Essential Surgical Care<br>Groth, S; World Health Organization, Emergency and Essential Surgical Care<br>Mwakyusa, DH; Ministry of Health and Social Welfare<br>Cherian, M; World Health Organization, Emergency and Essential Surgical Care |
| <b>Primary Subject Heading</b>: | Global health                                                                                                                                                                                                                                                                                                                                                                                                                                                                                                                                           |
| Secondary Subject Heading:      | Surgery                                                                                                                                                                                                                                                                                                                                                                                                                                                                                                                                                 |
| Keywords:                       | ANAESTHETICS, International health services < HEALTH SERVICES ADMINISTRATION & MANAGEMENT, OBSTETRICS, ORTHOPAEDIC & TRAUMA SURGERY, SURGERY                                                                                                                                                                                                                                                                                                                                                                                                            |
|                                 |                                                                                                                                                                                                                                                                                                                                                                                                                                                                                                                                                         |

SCHOLARONE™  
Manuscripts

EMERGENCY AND SURGERY SERVICES OF PRIMARY HOSPITALS  
IN THE UNITED REPUBLIC OF TANZANIA

Penoyar T<sup>a</sup>; Cohen H<sup>b</sup>; Kibatala P<sup>c</sup>; Magoda A<sup>d</sup>; Saguti G<sup>c</sup>;  
Noel L<sup>f</sup>; Groth S<sup>f</sup>; Mwakyusa DH<sup>e</sup>; Cherian M<sup>f</sup>

- a. Beth Israel Deaconess Medical Center, Boston, MA, United States of America  
b. Maimonides Medical Center, Brooklyn, NY, United States of America  
c. WHO Country Office, Dar es Salaam, United Republic of Tanzania  
d. St Francis Designated District Hospital, Ifakara, United Republic of Tanzania  
e. Ministry of Health and Social Welfare, United Republic of Tanzania  
f. Emergency & Essential Surgical Care program, Department Essential Health Technologies, WHO, Geneva, Switzerland

**Abstract**

**Background:** Delivering emergency and surgical care at first-referral facilities in developing countries is increasingly recognized as a cost-effective and achievable contributor to global public health. Quantification of a country's capacity to provide these emergency services is vital to both plan initiatives for strengthening health systems and track their impact.

**Methods:** The World Health Organization Tool for Situational Analysis to Assess Emergency and Essential Surgical Care was used to survey forty-eight, first-referral health facilities in the United Republic of Tanzania. Data from the surveys was uploaded into and analyzed from the WHO DataCol database for Emergency & Essential Surgical Care.

**Results:** The 48 facilities surveyed served 18.6 million residents (46% of the population). Supplies for basic airway management were inconsistently available. Only 42% had consistent access to oxygen, and only 6 functioning pulse oximeters were located in all facilities surveyed. 37.5% of facilities reported both consistent running water and electricity. While very basic interventions (suturing, wound debridement, incision & drainage) were provided in nearly all facilities, more advanced life-saving procedures including chest tube thoracostomy (30/48), open fracture management (29/48), and caesarean section delivery (32/48) were not consistently available.

**Conclusions:** Based on the results in this WHO country survey, significant gaps exist in the capacity for emergency and essential surgical services in Tanzania including deficits in human resources, essential equipment, and infrastructure. The information in this survey will provide a foundation for evidence-based decisions in country-level policy regarding the allocation of resources and provision of emergency and essential surgical services.

## Article Summary

### Article focus

- On-site visits to primary health centres in a developing nation
- Evaluate capacity to deliver emergency and surgical care
- Identify gaps in equipment, skills and personnel

### Key messages

- Basic surgical procedures are being performed in nearly all health centres
- Significant deficits in human resources, essential equipment, and infrastructure
- Pulse oximetry is rarely available

### Strengths and limitations

- Most comprehensive evaluation of a developing country's surgical capacity
- Based on established, well-accepted analysis tool
- Relies on subjective measures and estimates

## Introduction

Surgical services at the first referral level are an essential component of comprehensive primary health care. Conditions that can be treated with surgery account for an estimated 11% of the world's disability-adjusted life years.<sup>1</sup> Despite recent data estimating the global volume of surgery at 234 million surgical procedures annually and significant disparities between procedures performed in high and low income countries, global public health initiatives have traditionally neglected the necessity for the provision of surgical services.<sup>2</sup> Poor access to surgical services, particularly at rural facilities, results in excess morbidity and mortality from a broad range of treatable surgical conditions including injuries, complications of pregnancy, sequelae of infectious diseases, acute abdominal conditions, and congenital anomalies. Improving the access to surgical services in low-income countries requires a systems-based approach addressing gaps in infrastructure, trained/skilled personnel, appropriate equipment, and medications.

Tanzania, similar to other sub-Saharan African countries, faces significant challenges in the provision of health services. Infant mortality is 68 per 1,000 live births and maternal mortality rate is 578 per 100,000 live births.<sup>3</sup> The leading causes of maternal death (haemorrhage, unsafe abortion, eclampsia and obstructed labour) can all be addressed with appropriate emergency obstetric care, which often require surgical and/or anaesthesia interventions. In a 1999 Tanzanian Ministry of Health and Social Welfare (MoHSW) census, health facilities numbered 4,714 with 280 Hospitals, 479 Health Centers and 3,955 dispensaries for a total of 32,000 beds (1:896 people). There were 110 surgeons (1/3 in cities, 1/3 in administration & 1/3 emigrated) and 16 anesthesiologists. Human resources for health were critically absent, with fewer than 1/3 of posts filled in primary hospitals.<sup>4</sup>

As funders and public health experts adopt the expansion of primary health care services, the inclusion of surgical services at the first referral level is critical. The purpose of this survey was to collect knowledge gained from comprehensive quantitative assessments of

1  
2  
3 surgical capacity in Sub-Saharan African countries such as Tanzania in order to assist in  
4 planning strategies for universal access to life-saving and disability-preventing surgical  
5 services.  
6  
7

## 8 9 **Materials and Methods**

10 The WHO Tool for Situational Analysis to Assess Emergency and Essential Surgical  
11 Care was developed as a comprehensive questionnaire to quantify the surgical capacity in  
12 a wide range of health facilities <sup>5</sup>. This online tool, captures a health facility's capacity to  
13 perform basic surgical (including obstetrics and trauma) and anaesthesia interventions by  
14 investigating four categories of data: Infrastructure, Human Resources, Interventions  
15 Available, and Equipment. The tool queries the availability of 8 types of care providers,  
16 35 surgical interventions and 67 items of equipment.  
17

18 The WHO situation analysis tool to assess EESC was completed at 48 health facilities  
19 representing 16 of 26 regions in Tanzania. The health facility data were obtained during  
20 site visits by representatives from the Tanzania MoHSW, WHO country office and  
21 members of GIEESC between and March 2009 and October 2010. Data on various  
22 indices were entered into and analysed from the WHO Global DataCol database for  
23 EESC (Table1). Some results, such as the average distance travelled prior to admission,  
24 were expressed as a weighted mean to better reflect the distance travelled by the average  
25 patient seeking surgical care in the country. To calculate the weighted mean, we summed  
26 the products of annual admissions and average distance travelled for each facility, then  
27 divided by the sum of annual admissions for all facilities.  
28

29 By local convention, a physician who has trained in general surgery is considered a  
30 surgical specialist. Further specialization, such as urologic, orthopaedic or cardiothoracic  
31 surgery is termed as super-specialty. Facilities were asked the size of the "population  
32 served;" intending to quantify the population living in the catchment area. This value thus  
33 represents the number of residents who would use the facility as their first-referral health  
34 facility, not the number of patients seen.  
35  
36  
37  
38  
39  
40

## 41 **Results**

42 Forty-eight facilities, representing 16 of 26 regions and serving 18.6 million residents  
43 (46% of the population), completed the WHO IMEESC Situational Analysis research  
44 tool. The average population served per facility was 425,000, though five facilities served  
45 10,000 or fewer residents. A total of 9085 hospital beds were reported, averaging 189  
46 beds per facility. One-hundred eighteen operating rooms were identified.  
47

48 The weighted mean of distance travelled prior to admission was 119 km (74 miles).  
49 Figure 1 displays the locations of facilities with markers sized to the population served.  
50 This map demonstrates that the six facilities serving the largest population are located on  
51 the southern and northern periphery. The central regions are dominated by health  
52 facilities in rural areas serving small populations.  
53  
54  
55  
56  
57  
58  
59  
60

Annual admissions averaged 2001 per facility. On average, 34% of all admissions required either minor or major surgical interventions.

A total of 4965 health care providers were reported in the 48 facilities. 64 surgical specialists (i.e. physicians with dedicated surgical training) were identified, and 56 (88%) of identified surgical specialists were employed by the six largest hospitals. The great majority of anaesthesia providers (176/203 = 87%) were non-physicians, and only 11 formally trained anaesthesiologists were identified. Other medical staff providing surgical and anesthesia services in the facilities included 4017 assistant medical officers (non-physician medical officers, paramedics and midwives).

Of the 35 basic interventions listed in the tool, only suturing was available at all facilities. Additionally, incision & drainage, male circumcision and wound debridement were widely available and provided at 98%, 98% and 92% of facilities, respectively. Caesarean section was available at 67% of facilities.

Equipment was largely inadequate, including a significant gap in availability of functioning anaesthesia machines. Running water and electricity were widely available with only two facilities having no access to either water or electricity. However, only 37.5% of facilities reported both consistent running water and electricity. Greater than half of facilities reported never using eye protection, and 46% reported no access to this critical piece of personal protective equipment. Six facilities had all essential equipment consistently available: Bombo Regional Hospital, Dodoma Regional Hospital, St Francis District Hospital, Ilebula Hospital, Besha Health Centre and Muhimbili National Hospital. Oxygen supplies were inconsistent in many facilities. Twenty facilities (42%) had uninterrupted access to oxygen, with most relying on oxygen concentrators. Fifteen facilities (32%) had no access to an anaesthesia machine of any kind. Of all facilities surveyed, only six pulse oximeters were located. In Tanzania, the regional blood bank system is independent of any hospital facility, and 77% of facilities reported having a blood bank. X-ray was fully functional in 33% of facilities and interrupted in 44%, leaving 23% of facilities with no radiographic capacity. All facilities have access to haemoglobin and urine analysis testing.

Complete results from the evaluation are shown in Table 1. Information was placed into one of four mutually exclusive and comprehensive medical fields. For simplification in Table 1, laboratory tests and other infrastructure (i.e. blood bank, electricity) were included under Equipment.

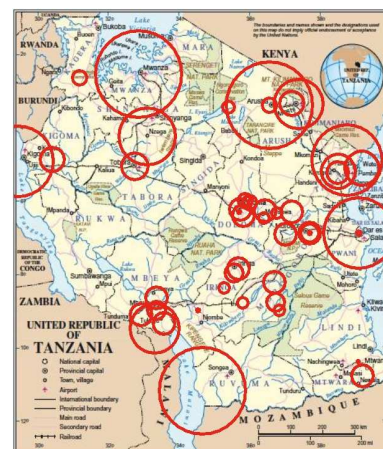

**Figure 1: Facilities evaluated. Ring size proportional to population served.**

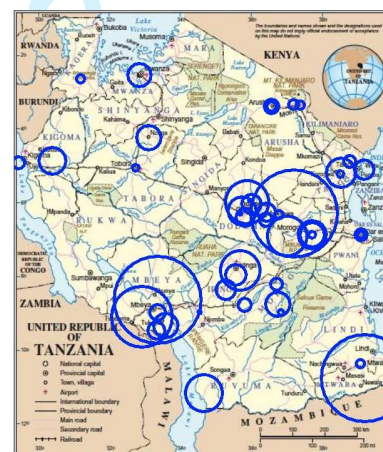

**Figure 2: Rings sized on ratio of (population served : annual procedures). Large rings are underserved.**



Table 1

| <b>General and Congenital</b>              |          |                                        | <b>C</b> | <b>I</b> | <b>N</b> |
|--------------------------------------------|----------|----------------------------------------|----------|----------|----------|
|                                            |          | Blood Bank                             | 29       | 48       | 23       |
| <b>Personnel</b>                           |          | Electricity                            | 44       | 52       | 4        |
| General physician performing surgery       | 113      | Emergency Guidelines                   | 25       | 13       | 63       |
| Non-physicians performing surgery          | 122      | Emergency Room                         | 33       | 15       | 52       |
| Paramedics and midwives                    | 4017     | Generator                              | 58       | 2        | 40       |
| Physicians trained in surgery (specialist) | 64       | Hemoglobin and Urine Analysis          | 96       | 4        | 0        |
|                                            |          | Medical Records                        | 98       | 2        | 0        |
| <b>Procedure</b>                           | <b>P</b> | Running Water                          | 56       | 35       | 8        |
| Appendectomy                               | 69       | Surgery Guidelines                     | 58       | 6        | 35       |
| Biopsy                                     | 81       | Cotton Wool                            | 77       | 21       | 2        |
| Burn care                                  | 90       | Adhesive Tape                          | 96       | 4        | 0        |
| Cataract repair                            | 35       | Apron, plastic, reusable               | 81       | 15       | 4        |
| Cleft lip repair                           | 25       | Bandages sterile                       | 98       | 2        | 0        |
| Congenital hernia repair                   | 71       | Batteries for flashlight               | 58       | 33       | 8        |
| Cystotomy                                  | 63       | Bucket, plastic                        | 94       | 6        | 0        |
| Hernia repair                              | 69       | Capped bottle, alcohol solution        | 79       | 13       | 8        |
| Hydrocele                                  | 88       | Disposable needles # 25, 21,19         | 98       | 2        | 0        |
| Incision & Drainage                        | 98       | Drum for sterile dressings             | 83       | 8        | 8        |
| Laparotomy                                 | 75       | Examination table                      | 90       | 10       | 0        |
| Male circumcision                          | 98       | Eye protection                         | 40       | 15       | 46       |
| Neonatal surgery                           | 35       | Face masks                             | 69       | 25       | 6        |
| Suturing                                   | 100      | Forceps, Kocher                        | 73       | 19       | 8        |
| Tubal Ligation/Vasectomy                   | 71       | Forceps, artery                        | 81       | 10       | 8        |
| Urethral stricture                         | 46       | Gloves (non-sterile)                   | 92       | 8        | 0        |
|                                            |          | Gloves (sterile)                       | 90       | 10       | 0        |
|                                            |          | Kidney dishes, stainless steel         | 88       | 13       | 0        |
|                                            |          | Light source (lamp & flashlight)       | 73       | 17       | 10       |
|                                            |          | Nail brush, scrubbing                  | 85       | 10       | 5        |
|                                            |          | Nasogastric tubes 10 to 16 FG          | 71       | 17       | 13       |
|                                            |          | Needle holder                          | 90       | 10       | 0        |
|                                            |          | Needles, cutting & round               | 94       | 6        | 0        |
|                                            |          | Retractors                             | 77       | 17       | 6        |
|                                            |          | Scalpel handle with blade              | 94       | 4        | 2        |
|                                            |          | Scissors blunt 14 cm                   | 83       | 15       | 2        |
|                                            |          | Scissors straight 12 cm                | 77       | 21       | 2        |
|                                            |          | Sharps disposal container              | 98       | 2        | 0        |
|                                            |          | Sheeting, plastic for exam table       | 65       | 23       | 13       |
|                                            |          | Soap                                   | 98       | 2        | 0        |
|                                            |          | Sterile gauze dressing                 | 96       | 4        | 0        |
|                                            |          | Sterilizer                             | 85       | 13       | 2        |
|                                            |          | Suction pump (manual or electric)      | 96       | 4        | 0        |
|                                            |          | Suture, synthetic absorbable           | 90       | 10       | 0        |
|                                            |          | Syringes 10ml                          | 100      | 0        | 0        |
|                                            |          | Syringes 2ml                           | 100      | 0        | 0        |
|                                            |          | Thermometer                            | 96       | 4        | 0        |
|                                            |          | Towel cloth                            | 85       | 13       | 2        |
|                                            |          | Urinary catheter disposable #12, 14,18 | 58       | 33       | 8        |
|                                            |          | Wash basin                             | 94       | 4        | 2        |
|                                            |          | Waste disposal container               | 98       | 2        | 0        |

C: % of facilities with consistent access

I: % of facilities with intermittent access

N: % of facilities with no access

P: % of facilities which offer the procedure

| <b>Anesthesiology/Airway Management</b>           |          |                                               |  | <b>C</b> | <b>I</b> | <b>N</b> |
|---------------------------------------------------|----------|-----------------------------------------------|--|----------|----------|----------|
|                                                   |          | Anesthesia Guidelines                         |  | 27       | 4        | 69       |
| <b>Personnel</b>                                  |          | Anesthesia Machine                            |  | 67       | 0        | 33       |
| General practitioners performing anesthesia       | 16       | Blood pressure measuring equipment            |  | 98       | 2        | 0        |
| Non-physicians performing anesthesia              | 176      | Cricothyroidotomy set                         |  | 27       | 21       | 52       |
| Physicians trained in anesthesiology (specialist) | 11       | Endotracheal tubes, cuffed sizes 5.5 to 9     |  | 65       | 8        | 27       |
|                                                   |          | Endotracheal tubes, uncuffed sizes 3.0 to 5.0 |  | 54       | 19       | 27       |
| <b>Procedure</b>                                  | <b>P</b> | IV cannula sizes 18,22,24                     |  | 92       | 8        | 0        |
| Airway Foreign Body                               | 83       | IV infusion set                               |  | 90       | 10       | 0        |
| Cricothyroidotomy                                 | 44       | IV Infusor bags                               |  | 73       | 10       | 17       |
| General Anesthesia                                | 65       | Laryngoscope handle                           |  | 71       | 15       | 15       |
| Ketamine IV                                       | 67       | Laryngoscope Macintosh blades (adult)         |  | 73       | 15       | 13       |
| Regional Anesthesia                               | 42       | Laryngoscope Macintosh blades (paediatric)    |  | 46       | 21       | 33       |
| Resuscitation                                     | 88       | Magills Forceps (adult)                       |  | 56       | 27       | 17       |
| Spinal Anesthesia                                 | 77       | Magills Forceps (paediatric)                  |  | 38       | 23       | 40       |
|                                                   |          | Mask & tubing to connect to oxygen supply     |  | 46       | 27       | 27       |
|                                                   |          | Oropharyngeal airway (adult)                  |  | 42       | 35       | 23       |
|                                                   |          | Oropharyngeal airway (paediatric)             |  | 21       | 23       | 56       |
|                                                   |          | Oxygen Concentrator                           |  | 75       | 13       | 13       |
|                                                   |          | Oxygen Cylinder                               |  | 33       | 31       | 35       |
|                                                   |          | Pain management guidelines                    |  | 25       | 13       | 63       |
|                                                   |          | Post-operative recovery room                  |  | 29       | 10       | 60       |
|                                                   |          | Pulse oximetry                                |  | 13       | 4        | 83       |
|                                                   |          | Resuscitator bag valve & mask (adult)         |  | 67       | 15       | 19       |
|                                                   |          | Resuscitator bag valve & mask (paediatric)    |  | 38       | 17       | 46       |
|                                                   |          | Scalp vein infusion set                       |  | 98       | 2        | 0        |
|                                                   |          | Spare bulbs and batteries for laryngoscope    |  | 44       | 27       | 29       |
|                                                   |          | Stethoscope                                   |  | 98       | 2        | 0        |
|                                                   |          | Suction catheter sizes 16 Fr                  |  | 77       | 15       | 8        |
|                                                   |          | Tongue depressor, wooden, disposable          |  | 83       | 13       | 4        |
| <b>Orthopaedics and Traumatology</b>              |          |                                               |  | <b>C</b> | <b>I</b> | <b>N</b> |
|                                                   |          | Radiography                                   |  | 33       | 44       | 23       |
| <b>Procedure</b>                                  | <b>P</b> | Chest tube insertion equipment                |  | 54       | 25       | 21       |
| Chest tube placement                              | 63       | Splints for arm, leg                          |  | 63       | 21       | 17       |
| Clubfoot repair                                   | 35       | Tourniquet                                    |  | 96       | 4        | 0        |
| Contracture release                               | 33       |                                               |  |          |          |          |
| Debridement                                       | 92       |                                               |  |          |          |          |
| Fracture management, closed                       | 88       |                                               |  |          |          |          |
| Fracture management, open                         | 61       |                                               |  |          |          |          |
| Joint dislocation reduction                       | 92       |                                               |  |          |          |          |
| Limb amputation                                   | 65       |                                               |  |          |          |          |
| Osteomyelitis/septic arthritis                    | 63       |                                               |  |          |          |          |
| <b>Obstetrics/Gynaecology</b>                     |          |                                               |  | <b>C</b> | <b>I</b> | <b>N</b> |
|                                                   |          | Vaginal speculum                              |  | 90       | 10       | 27       |
| <b>Personnel</b>                                  |          |                                               |  |          |          |          |
| Physicians trained in OBGYN (specialists)         | 74       |                                               |  |          |          |          |
| <b>Procedure</b>                                  | <b>P</b> |                                               |  |          |          |          |
| Caesarean delivery                                | 67       |                                               |  |          |          |          |
| Dilation and curettage                            | 77       |                                               |  |          |          |          |
| Obstetric fistula repair                          | 21       |                                               |  |          |          |          |

## Discussion

More than five million people die from injuries every year, and many more are left with permanent disabilities. Significant disparities in care exist between high and low income countries for patients with surgically treatable conditions. An estimate of the global burden of surgery showed that only 26% of estimated surgical procedures were performed in low-income countries, despite these countries accounting for 70% of the global population.<sup>2</sup> Of the estimated 536,000 maternal deaths in 2005, developing countries accounted for 99% of these deaths<sup>6</sup>; much of this mortality could be prevented by timely access to emergency and basic surgical services.

The provision of surgical services has historically been neglected in public health programs<sup>7</sup>. It is often assumed that surgery and anaesthesia interventions are expensive, technologically demanding, and can only be delivered in large hospitals and by specialists. However, limiting surgical care to large facilities in developing countries makes it inaccessible to the large segment of the population in decentralized areas. Experience shows that basic surgical services can be cost-effective and safely delivered even in settings with limited resources.<sup>8</sup>

Two studies have examined the cost effectiveness of small hospitals performing basic surgical operations in resource poor settings.<sup>9-10</sup> The cost per DALY averted in each study for all patients seen was US\$10.93 and US\$32.78. Although these studies did not separate surgical from non-surgical patients in calculating cost/DALY, both hospitals had a significant percentage (29%-67%) of surgical diagnoses contributing to the calculation. These costs compare favourably with other primary health interventions in developing countries.<sup>1</sup>

WHO developed the Integrated Management for Emergency and Essential Surgical Care (IMEESC) toolkit which has been implemented in 37 countries including Tanzania in January 2007<sup>5</sup>. Targeted activities to improve surgical capacity have included the formation of a formal 'Surgical Task force' in Tanzania MoHSW, training courses, the adoption of IMEESC toolkit by the Tanzania Surgical Association, and hosting the biennial WHO GIEESC meeting in Dar es Salaam, Tanzania.

The WHO Global Initiative for Emergency and Essential Surgical Care (GIEESC) was established in 2005 as a collaboration of local and international organizations, academia, health authorities and WHO, in response to the recognition of surgery as a critical component of population based health<sup>5</sup>. The research arm of WHO GIEESC developed the WHO situational analysis tool to provide data in surgical care capacity to assist ministries of health in low and middle income countries for making evidence-based improvements.

This study provides an overview of the capacity for surgical care in 16 regions of Tanzania and demonstrates the significant gaps in infrastructure, human resources, life-saving and disability-preventive surgical interventions, and essential equipment.

Despite the introduction of the WHO program for emergency and essential surgical care in Tanzania in 2007 and the efforts by the Tanzanian MoH& SW to train non-physicians



1  
2  
3 to deliver select surgical services such as caesarean sections, skilled health personnel to  
4 deliver surgical services remain inadequate for a significant portion of the country. This  
5 deficit is most pronounced in the rural areas, where patients travel great distances to  
6 reach health facilities and consequently face significant delays in care.  
7  
8

9 Although most facilities had a functioning operating theatre, fewer than half had  
10 uninterrupted access to oxygen and a third of facilities did not have access to an  
11 anaesthesia machine as is seen in many Sub-Saharan African countries<sup>11</sup>. Significant  
12 improvements in surgical mortality in developed countries have resulted from  
13 improvements in the delivery of safe anaesthesia. The existing gap of safe anaesthesia  
14 services likely limits the availability of life-saving surgeries in Tanzania or results in  
15 significant complications and unnecessary patient suffering when anaesthesia is not  
16 available.  
17  
18

19  
20 Of the 35 basic surgical interventions, many hospitals did not have the capacity to deliver  
21 all of the basic services. As demonstrated in Figure 2, this survey showed that facilities in  
22 the central and southern region had less capacity to provide basic surgical services.  
23 Additionally, the consistent lack of oxygen tubing, pulse oximeters, and paediatric airway  
24 equipment is a significant barrier to the provision of life-saving services in the regions  
25 studied.  
26  
27

28 Delivery of surgical services is dependent on the availability of all components inherent  
29 in a functioning health system. Systematic changes which address human resources,  
30 supplies/equipment, and infrastructure are necessary to improve mortality from surgically  
31 treatable conditions. The benefits of these changes will significantly impact the mortality  
32 of patients with obstetric related emergencies and traumatic injuries, particularly women  
33 and children. However, the efforts made to improve disease-specific surgical  
34 interventions will not have an isolated impact on surgically treatable conditions and meet  
35 the Millennium Development Goals 4, 5 and 6. Systematic changes such as investments  
36 in oxygen and related equipment, and appropriately trained surgical workforce will also  
37 serve to benefit patients suffering from a range of conditions including sepsis,  
38 pneumonia, HIV related conditions, and other infectious diseases.  
39  
40  
41

42 There are several limitations to this survey. First, it provides only a brief overview of the  
43 capacity for surgical care and cannot be used for detailed program planning. Secondly, an  
44 independent observer did not verify the answers provided in the survey by the health  
45 provider or director of the health facilities. Thirdly, it does not capture data from every  
46 first referral health facilities of the country.  
47  
48

49  
50 This survey presents the first snapshot of life-saving surgical services in Tanzania using  
51 the WHO Tool for Situational Analysis to Assess Emergency and Essential Surgical  
52 Care. This snapshot view provides additional evidence that investments in human  
53 resources, essential equipment, and infrastructure are needed to strengthen district  
54 surgical services in Tanzania to benefit rural population. Addressing the unmet need of  
55 surgical (including anaesthesia, obstetrics and trauma) services within existing related  
56 national programs for maternal and child health will strengthen health systems,  
57  
58  
59  
60

1  
2  
3 particularly at the district level.<sup>12</sup> These investments will have the secondary effect of  
4 improving the overall health care system and the treatment of many non-surgical  
5 conditions. Further research is needed to quantify the true burden of surgical disease in  
6 Tanzania and the cost-benefit of specific interventions to improve surgical services.  
7  
8  
9

10 **Acknowledgements:** The following members of GIEESC in Tanzania were instrumental  
11 in obtaining the reported data: Prof. Neboth Mbembati, Prof. Victor Mwafongo, Dr. Paul  
12 Mareale, Dr. Jasper Mbwambo, Dr. Amani Malima, Dr. Mtumwa Ibrahim, Dr Rashid  
13 Mayoka.  
14  
15

16 **Funding Statement:** This research received no specific grant from any funding agency  
17 in the public, commercial or not-for-profit sectors.  
18  
19

20 **Competing Interests:** I declare that the authors have no competing interests as defined  
21 by BMJ Open, or other interests that might be perceived to influence the results and/or  
22 discussion reported in this article.  
23

24 **Disclaimer:** The authors include staff members of the World Health Organization. They  
25 are responsible for the views expressed in this publication and do not necessarily  
26 represent the decisions or stated policy of the World Health Organization.  
27  
28  
29  
30  
31  
32  
33  
34  
35  
36  
37  
38  
39  
40  
41  
42  
43  
44  
45  
46  
47  
48  
49  
50  
51  
52  
53  
54  
55  
56  
57  
58  
59  
60

## References

- <sup>1</sup> Debas HT, Gosselin R, McCord C, et al. Surgery. In: Jamison D, ed. Disease control priorities in developing countries, 2nd edn. New York: Oxford University Press, 2006: 1245-59.
- <sup>2</sup> Weiser TG, Regenbogen SE, Thompson KD, et al. An estimation of the global volume of surgery: a modeling strategy based on available data. *Lancet* 2008; 372: 139-44.
- <sup>3</sup> *World Health Organization* (Internet site). Geneva: World Health Organization. Available online: <http://www.who.int/countries/tza/en/> [accessed 18 February 2011].
- <sup>4</sup> The National Road Map Strategic Plan to Accelerate Reduction of Maternal, Newborn and Child Deaths in Tanzania 2008-2015. Ministry of Health and Social Welfare, United Republic of Tanzania, 2008.
- <sup>5</sup> *Emergency and essential surgical care* (Internet site). Geneva: World Health Organization. Available online: <http://www.who.int/surgery> [accessed 18 February 2011]
- <sup>6</sup> Maternal mortality in 2005: estimates developed by WHO, UNICEF, UNFPA and the World Bank. Geneva, World Health Organization, 2007 ([http://www.who.int/reproductive-health/publications/maternal\\_mortality\\_2005/mme\\_2005.pdf](http://www.who.int/reproductive-health/publications/maternal_mortality_2005/mme_2005.pdf)).
- <sup>7</sup> Cherian M, Choo S, Wilson I, et al. Building and retaining the neglected anaesthesia health workforce: is it crucial for health systems strengthening through primary health care? *Bull WHO* 2010;88:637-639.
- <sup>8</sup> Laxminarayan R, Mills AJ, Breman JG, et al. Advancement of global health: key messages from the Disease Control Priorities Project. *Lancet*. 2006 Apr 8;367(9517):1193-208.
- <sup>9</sup> Spiegel D, Gosselin R. Surgical services in low-income and middle-income countries. *Lancet* 2008; 370 (9592):1013-1015.
- <sup>10</sup> McCord C, Chowdhury J. A cost-effective small hospital in Bangladesh: what it can mean for emergency obstetric care. *Int J Gynaecol Obstet*. 2003; 81(1): 83-92.
- <sup>11</sup> Belle J, Cohen H, Shindo N, et al. Influenza preparedness in low-resource settings: a look at oxygen delivery in 12 African countries. *J Inf Dev Count* 2010; 4(7):419-424.
- <sup>12</sup> Hedges JP, Mock CN, Cherian MN. The Political Economy of Emergency and Essential Surgery in Global Health. *World J Surg* 2010;34(9):2003-6.

1  
2  
3  
4  
5  
6  
7  
8  
9  
10  
11  
12  
13  
14  
15  
16  
17  
18  
19  
20  
21  
22  
23  
24  
25  
26  
27  
28  
29  
30  
31  
32  
33  
34  
35  
36  
37  
38  
39  
40  
41  
42  
43  
44  
45  
46  
47  
48  
49  
50  
51  
52  
53  
54  
55  
56  
57  
58  
59  
60

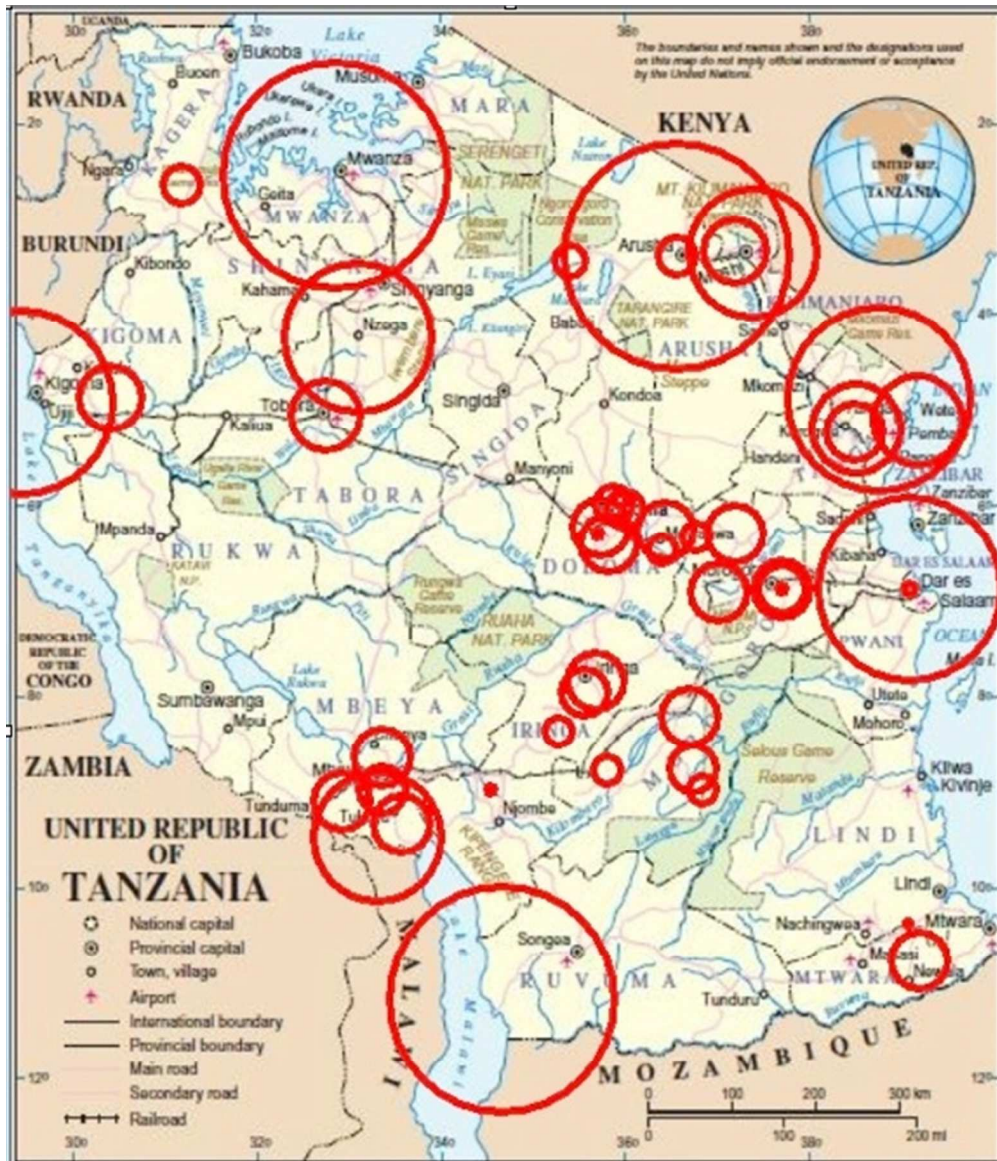

203x234mm (72 x 72 DPI)



1  
2  
3  
4  
5  
6  
7  
8  
9  
10  
11  
12  
13  
14  
15  
16  
17  
18  
19  
20  
21  
22  
23  
24  
25  
26  
27  
28  
29  
30  
31  
32  
33  
34  
35  
36  
37  
38  
39  
40  
41  
42  
43  
44  
45  
46  
47  
48  
49  
50  
51  
52  
53  
54  
55  
56  
57  
58  
59  
60

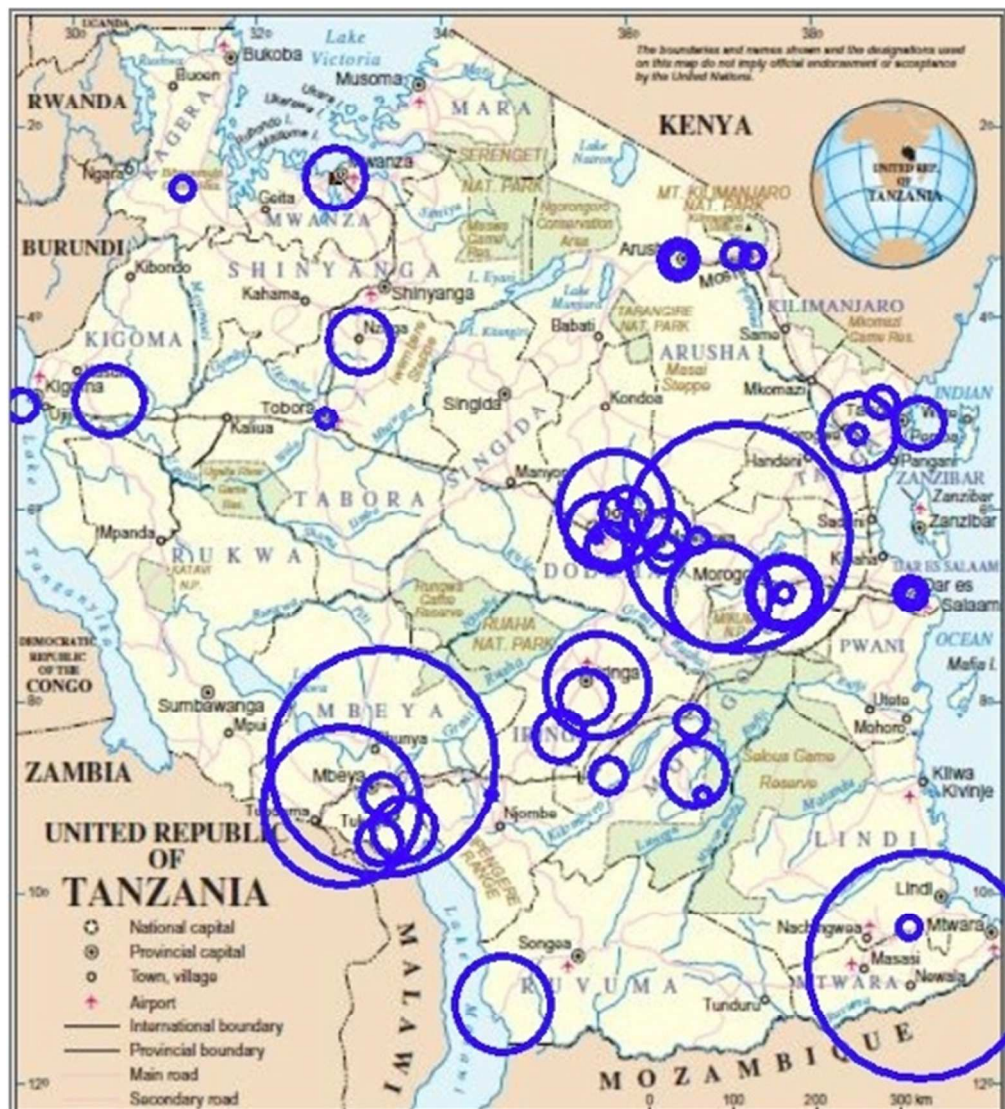

203x225mm (72 x 72 DPI)



1  
2  
3  
4  
5  
6  
7  
8  
9  
10  
11  
12  
13  
14  
15  
16  
17  
18  
19  
20  
21  
22  
23  
24  
25  
26  
27  
28  
29  
30  
31  
32  
33  
34  
35  
36  
37  
38  
39  
40  
41  
42  
43  
44  
45  
46  
47  
48  
49  
50  
51  
52  
53  
54  
55  
56  
57  
58  
59  
60STROBE Statement—Checklist of items that should be included in reports of *cross-sectional studies*

## PAGE NUMBER

Item  
No

## Recommendation

| PAGE NUMBER                    | Item No | Recommendation                                                                                                                                                                                                                                                                                                                                                                                                |
|--------------------------------|---------|---------------------------------------------------------------------------------------------------------------------------------------------------------------------------------------------------------------------------------------------------------------------------------------------------------------------------------------------------------------------------------------------------------------|
| <b>1 Title and abstract</b>    | 1       | (a) Indicate the study's design with a commonly used term in the title or the abstract<br>(b) Provide in the abstract an informative and balanced summary of what was done and what was found                                                                                                                                                                                                                 |
| <b>Introduction</b>            |         |                                                                                                                                                                                                                                                                                                                                                                                                               |
| 2 Background/rationale         | 2       | Explain the scientific background and rationale for the investigation being reported                                                                                                                                                                                                                                                                                                                          |
| 2 Objectives                   | 3       | State specific objectives, including any prespecified hypotheses                                                                                                                                                                                                                                                                                                                                              |
| <b>Methods</b>                 |         |                                                                                                                                                                                                                                                                                                                                                                                                               |
| 3 Study design                 | 4       | Present key elements of study design early in the paper                                                                                                                                                                                                                                                                                                                                                       |
| 3 Setting                      | 5       | Describe the setting, locations, and relevant dates, including periods of recruitment, exposure, follow-up, and data collection                                                                                                                                                                                                                                                                               |
| 3 Participants                 | 6       | (a) Give the eligibility criteria, and the sources and methods of selection of participants                                                                                                                                                                                                                                                                                                                   |
| 3 Variables                    | 7       | Clearly define all outcomes, exposures, predictors, potential confounders, and effect modifiers. Give diagnostic criteria, if applicable                                                                                                                                                                                                                                                                      |
| 3 Data sources/<br>measurement | 8*      | For each variable of interest, give sources of data and details of methods of assessment (measurement). Describe comparability of assessment methods if there is more than one group                                                                                                                                                                                                                          |
| 3 Bias                         | 9       | Describe any efforts to address potential sources of bias                                                                                                                                                                                                                                                                                                                                                     |
| 3 Study size                   | 10      | Explain how the study size was arrived at                                                                                                                                                                                                                                                                                                                                                                     |
| 3 Quantitative variables       | 11      | Explain how quantitative variables were handled in the analyses. If applicable, describe which groupings were chosen and why                                                                                                                                                                                                                                                                                  |
| 3 Statistical methods          | 12      | (a) Describe all statistical methods, including those used to control for confounding<br>(b) Describe any methods used to examine subgroups and interactions<br>(c) Explain how missing data were addressed<br>(d) If applicable, describe analytical methods taking account of sampling strategy<br>(e) Describe any sensitivity analyses                                                                    |
| <b>Results</b>                 |         |                                                                                                                                                                                                                                                                                                                                                                                                               |
| 3 Participants                 | 13*     | (a) Report numbers of individuals at each stage of study—eg numbers potentially eligible, examined for eligibility, confirmed eligible, included in the study, completing follow-up, and analysed<br>(b) Give reasons for non-participation at each stage<br>(c) Consider use of a flow diagram                                                                                                               |
| 3 Descriptive data             | 14*     | (a) Give characteristics of study participants (eg demographic, clinical, social) and information on exposures and potential confounders<br>(b) Indicate number of participants with missing data for each variable of interest                                                                                                                                                                               |
| 4 Outcome data                 | 15*     | Report numbers of outcome events or summary measures                                                                                                                                                                                                                                                                                                                                                          |
| 5-6 Main results               | 16      | (a) Give unadjusted estimates and, if applicable, confounder-adjusted estimates and their precision (eg, 95% confidence interval). Make clear which confounders were adjusted for and why they were included<br>(b) Report category boundaries when continuous variables were categorized<br>(c) If relevant, consider translating estimates of relative risk into absolute risk for a meaningful time period |
| N/A Other analyses             | 17      | Report other analyses done—eg analyses of subgroups and interactions, and sensitivity analyses                                                                                                                                                                                                                                                                                                                |

| <b>Discussion</b>        |    |                                                                                                                                                                            |
|--------------------------|----|----------------------------------------------------------------------------------------------------------------------------------------------------------------------------|
| 7 Key results            | 18 | Summarise key results with reference to study objectives                                                                                                                   |
| 7, 8 Limitations         | 19 | Discuss limitations of the study, taking into account sources of potential bias or imprecision. Discuss both direction and magnitude of any potential bias                 |
| 8 Interpretation         | 20 | Give a cautious overall interpretation of results considering objectives, limitations, multiplicity of analyses, results from similar studies, and other relevant evidence |
| 8 Generalisability       | 21 | Discuss the generalisability (external validity) of the study results                                                                                                      |
| <b>Other information</b> |    |                                                                                                                                                                            |
| 9 Funding                | 22 | Give the source of funding and the role of the funders for the present study and, if applicable, for the original study on which the present article is based              |

\*Give information separately for exposed and unexposed groups.

**Note:** An Explanation and Elaboration article discusses each checklist item and gives methodological background and published examples of transparent reporting. The STROBE checklist is best used in conjunction with this article (freely available on the Web sites of PLoS Medicine at <http://www.plosmedicine.org/>, Annals of Internal Medicine at <http://www.annals.org/>, and Epidemiology at <http://www.epidem.com/>). Information on the STROBE Initiative is available at [www.strobe-statement.org](http://www.strobe-statement.org).

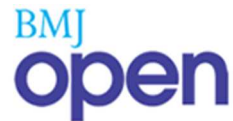

**A COMPREHENSIVE ON-SITE EVALUATION OF EMERGENCY AND SURGERY SERVICES OF PRIMARY HOSPITALS IN THE UNITED REPUBLIC OF TANZANIA**

|                                 |                                                                                                                                                                                                                                                                                                                                                                                                                                                                                                                                                              |
|---------------------------------|--------------------------------------------------------------------------------------------------------------------------------------------------------------------------------------------------------------------------------------------------------------------------------------------------------------------------------------------------------------------------------------------------------------------------------------------------------------------------------------------------------------------------------------------------------------|
| Journal:                        | <i>BMJ Open</i>                                                                                                                                                                                                                                                                                                                                                                                                                                                                                                                                              |
| Manuscript ID:                  | bmjopen-2011-000369.R1                                                                                                                                                                                                                                                                                                                                                                                                                                                                                                                                       |
| Article Type:                   | Research                                                                                                                                                                                                                                                                                                                                                                                                                                                                                                                                                     |
| Date Submitted by the Author:   | 23-Nov-2011                                                                                                                                                                                                                                                                                                                                                                                                                                                                                                                                                  |
| Complete List of Authors:       | Penoyar, Tom; World Health Organization, Emergency and Essential Surgical Care<br>Cohen, Hillary; Maimonides Medical Center,<br>Kibatala, P; WHO Country Office,<br>Magoda, A; St Francis Designated District Hospital,<br>Saguti, G; WHO Country Office,<br>Noel, L; World Health Organization, Emergency and Essential Surgical Care<br>Groth, S; World Health Organization, Emergency and Essential Surgical Care<br>Mwakyusa, DH; Ministry of Health and Social Welfare,<br>Cherian, M; World Health Organization, Emergency and Essential Surgical Care |
| <b>Primary Subject Heading</b>: | Global health                                                                                                                                                                                                                                                                                                                                                                                                                                                                                                                                                |
| Secondary Subject Heading:      | Surgery, Emergency medicine, Health services research                                                                                                                                                                                                                                                                                                                                                                                                                                                                                                        |
| Keywords:                       | ANAESTHETICS, International health services < HEALTH SERVICES ADMINISTRATION & MANAGEMENT, OBSTETRICS, ORTHOPAEDIC & TRAUMA SURGERY, SURGERY                                                                                                                                                                                                                                                                                                                                                                                                                 |
|                                 |                                                                                                                                                                                                                                                                                                                                                                                                                                                                                                                                                              |

SCHOLARONE™  
Manuscripts

1  
2  
3  
4  
5  
6  
7  
8  
9  
10  
11  
12  
13  
14  
15  
16  
17  
18  
19  
20  
21  
22  
23  
24  
25  
26  
27  
28  
29  
30  
31  
32  
33  
34  
35  
36  
37  
38  
39  
40  
41  
42  
43  
44  
45  
46  
47  
48  
49  
50  
51  
52  
53  
54  
55  
56  
57  
58  
59  
60

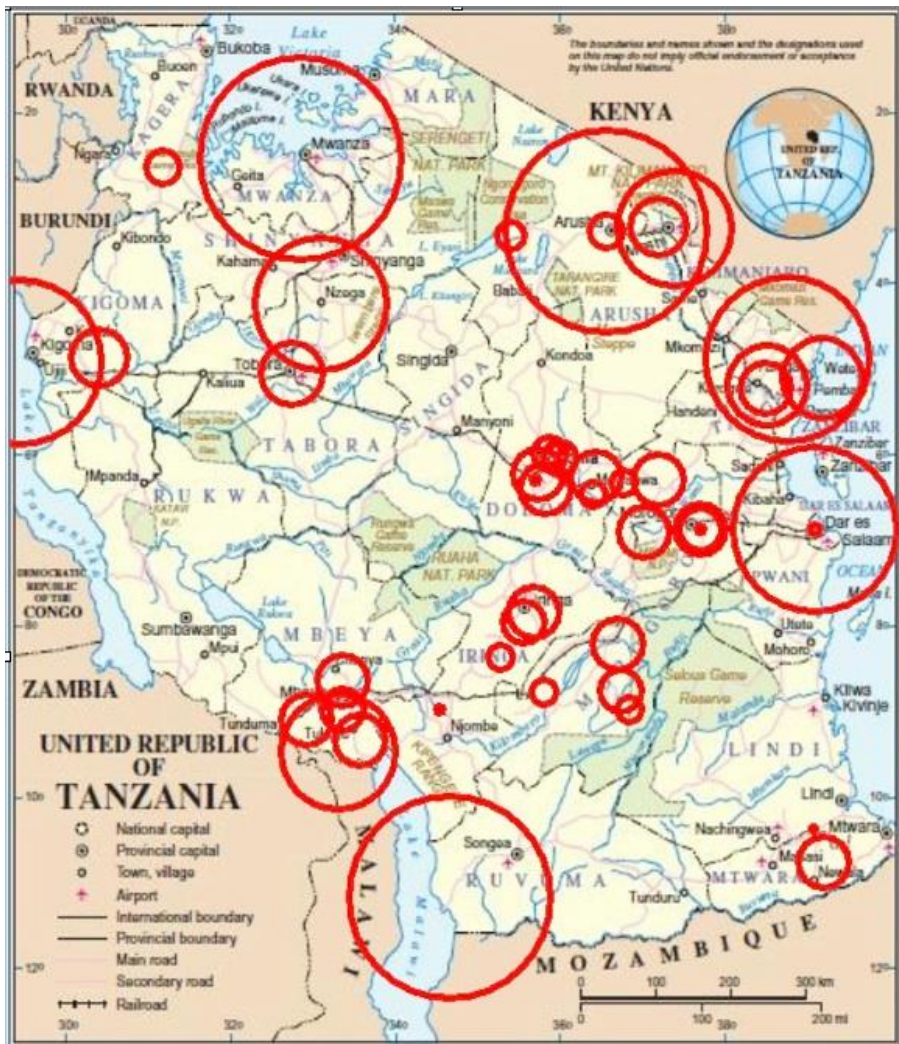

For peer review only

1  
2  
3 "Thank you Dr Gosselin and Dr Silimperi for your comments. We agree with their  
4 suggestions and incorporated what we felt was appropriate for the scope of the paper.  
5 Dr Gosselin's reference was indeed incorrect and has been fixed. Dr Silimperi raised  
6 some very relevant points about the short-comings of the paper. We appreciated her  
7 suggestion about data ranges and we have included those ranges in the paper.  
8  
9 Regarding participants medical qualifications, this highlights one of the great challenges  
10 of medical research in developing countries, the fact that every nation and region has  
11 different qualifications. All our on-site visits were performed by a licensed "western"  
12 physician (USA, Canada or Western Europe) or a local licensed physician. Plus, the  
13 survey tool was not designed to require an MD to complete, so we feel our survey  
14 personnel were adequate."  
15  
16  
17  
18  
19  
20  
21  
22  
23  
24  
25  
26  
27  
28  
29  
30  
31  
32  
33  
34  
35  
36  
37  
38  
39  
40  
41  
42  
43  
44  
45  
46  
47  
48  
49  
50  
51  
52  
53  
54  
55  
56  
57  
58  
59  
60



EMERGENCY AND SURGERY SERVICES OF PRIMARY HOSPITALS  
IN THE UNITED REPUBLIC OF TANZANIA

Penoyar T<sup>a</sup>; Cohen H<sup>b</sup>; Kibatala P<sup>c</sup>; Magoda A<sup>d</sup>; Saguti G<sup>c</sup>;  
Noel L<sup>f</sup>; Groth S<sup>f</sup>; Mwakyusa DH<sup>e</sup>; Cherian M<sup>f</sup>

- a. Beth Israel Deaconess Medical Center, Boston, MA, United States of America  
b. Maimonides Medical Center, Brooklyn, NY, United States of America  
c. WHO Country Office, Dar es Salaam, United Republic of Tanzania  
d. St Francis Designated District Hospital, Ifakara, United Republic of Tanzania  
e. Ministry of Health and Social Welfare, United Republic of Tanzania  
f. Emergency & Essential Surgical Care program, Department Essential Health Technologies, WHO, Geneva, Switzerland

**Abstract**

**Background:** Delivering emergency and surgical care at first-referral facilities in developing countries is increasingly recognized as a cost-effective and achievable contributor to global public health. Quantification of a country's capacity to provide these emergency services is vital to both plan initiatives for strengthening health systems and track their impact.

**Methods:** The World Health Organization Tool for Situational Analysis to Assess Emergency and Essential Surgical Care was used to survey forty-eight, first-referral health facilities in the United Republic of Tanzania. Data from the surveys was uploaded into and analyzed from the WHO DataCol database for Emergency & Essential Surgical Care.

**Results:** The 48 facilities surveyed served 18.6 million residents (46% of the population). Supplies for basic airway management were inconsistently available. Only 42% had consistent access to oxygen, and only 6 functioning pulse oximeters were located in all facilities surveyed. 37.5% of facilities reported both consistent running water and electricity. While very basic interventions (suturing, wound debridement, incision & drainage) were provided in nearly all facilities, more advanced life-saving procedures including chest tube thoracostomy (30/48), open fracture management (29/48), and caesarean section delivery (32/48) were not consistently available.

**Conclusions:** Based on the results in this WHO country survey, significant gaps exist in the capacity for emergency and essential surgical services in Tanzania including deficits in human resources, essential equipment, and infrastructure. The information in this survey will provide a foundation for evidence-based decisions in country-level policy regarding the allocation of resources and provision of emergency and essential surgical services.

## Article Summary

### Article focus

- On-site visits to primary health centres in a developing nation
- Evaluate capacity to deliver emergency and surgical care
- Identify gaps in equipment, skills and personnel

### Key messages

- Basic surgical procedures are being performed in nearly all health centres
- Significant deficits in human resources, essential equipment, and infrastructure
- Pulse oximetry is rarely available

### Strengths and limitations

- Most comprehensive evaluation of a developing country's surgical capacity
- Based on established, well-accepted analysis tool
- Relies on subjective measures and estimates

## Introduction

Surgical services at the first referral level are an essential component of comprehensive primary health care. Conditions that can be treated with surgery account for an estimated 11% of the world's disability-adjusted life years.<sup>1</sup> Despite recent data estimating the global volume of surgery at 234 million surgical procedures annually and significant disparities between procedures performed in high and low income countries, global public health initiatives have traditionally neglected the necessity for the provision of surgical services.<sup>2</sup> Poor access to surgical services, particularly at rural facilities, results in excess morbidity and mortality from a broad range of treatable surgical conditions including injuries, complications of pregnancy, sequelae of infectious diseases, acute abdominal conditions, and congenital anomalies. Improving the access to surgical services in low-income countries requires a systems-based approach addressing gaps in infrastructure, trained/skilled personnel, appropriate equipment, and medications.

Tanzania, similar to other sub-Saharan African countries, faces significant challenges in the provision of health services. Infant mortality is 68 per 1,000 live births and maternal mortality rate is 578 per 100,000 live births.<sup>3</sup> The leading causes of maternal death (haemorrhage, unsafe abortion, eclampsia and obstructed labour) can all be addressed with appropriate emergency obstetric care, which often require surgical and/or anaesthesia interventions. In a 1999 Tanzanian Ministry of Health and Social Welfare (MoHSW) census, health facilities numbered 4,714 with 280 Hospitals, 479 Health Centers and 3,955 dispensaries for a total of 32,000 beds (1:896 people). There were 110 surgeons (1/3 in cities, 1/3 in administration & 1/3 emigrated) and 16 anesthesiologists. Human resources for health were critically absent, with fewer than 1/3 of posts filled in primary hospitals.<sup>4</sup>

As funders and public health experts adopt the expansion of primary health care services, the inclusion of surgical services at the first referral level is critical. The purpose of this survey was to collect knowledge gained from comprehensive quantitative assessments of

1  
2  
3 surgical capacity in Sub-Saharan African countries such as Tanzania in order to assist in  
4 planning strategies for universal access to life-saving and disability-preventing surgical  
5 services.  
6  
7

## 8 9 **Materials and Methods**

10  
11 The WHO Tool for Situational Analysis to Assess Emergency and Essential Surgical  
12 Care was developed as a comprehensive questionnaire to quantify the surgical capacity in  
13 a wide range of health facilities <sup>5</sup>. This online tool, captures a health facility's capacity to  
14 perform basic surgical (including obstetrics and trauma) and anaesthesia interventions by  
15 investigating four categories of data: Infrastructure, Human Resources, Interventions  
16 Available, and Equipment. The tool queries the availability of 8 types of care providers,  
17 35 surgical interventions and 67 items of equipment.  
18

19  
20 The WHO situation analysis tool to assess EESC was completed at 48 health facilities  
21 representing 16 of 26 regions in Tanzania. The health facility data were obtained during  
22 site visits by representatives from the Tanzania MoHSW, WHO country office and  
23 members of GIEESC between and March 2009 and October 2010. Data on various  
24 indices were entered into and analysed from the WHO Global DataCol database for  
25 EESC (Table1). Some results, such as the average distance travelled prior to admission,  
26 were expressed as a weighted mean to better reflect the distance travelled by the average  
27 patient seeking surgical care in the country. To calculate the weighted mean, we summed  
28 the products of annual admissions and average distance travelled for each facility, then  
29 divided by the sum of annual admissions for all facilities.  
30  
31

32 By local convention, a physician who has trained in general surgery is considered a  
33 surgical specialist. Further specialization, such as urologic, orthopaedic or cardiothoracic  
34 surgery is termed as super-specialty. Facilities were asked the size of the "population  
35 served;" intending to quantify the population living in the catchment area. This value thus  
36 represents the number of residents who would use the facility as their first-referral health  
37 facility, not the number of patients seen.  
38  
39

## 40 41 **Results**

42  
43 Forty-eight facilities, representing 16 of 26 regions and serving 18.6 million residents  
44 (46% of the population), completed the WHO IMEESC Situational Analysis research  
45 tool. The average population served per facility was 425,000, though five facilities served  
46 10,000 or fewer residents. A total of 9085 hospital beds were reported, averaging 189  
47 beds per facility (range 15 to 350 beds). One-hundred eighteen operating rooms were  
48 identified.  
49

50  
51 The weighted mean of distance travelled prior to admission was 119 km (74 miles).  
52 Figure 1 displays the locations of facilities with markers sized to the population served.  
53 This map demonstrates that the six facilities serving the largest population are located on  
54 the southern and northern periphery. The central regions are dominated by health  
55 facilities in rural areas serving small populations.  
56  
57  
58  
59  
60

Annual admissions averaged 2001 per facility (range 350 to 5000). On average, 34% of all admissions required either minor or major surgical interventions.

A total of 4965 health care providers were reported in the 48 facilities. 64 surgical specialists (i.e. physicians with dedicated surgical training) were identified, and 56 (88%) of identified surgical specialists were employed by the six largest hospitals. The great majority of anaesthesia providers (176/203 = 87%) were non-physicians, and only 11 formally trained anaesthesiologists were identified. Other medical staff providing surgical and anesthesia services in the facilities included 4017 assistant medical officers (non-physician medical officers, paramedics and midwives).

Of the 35 basic interventions listed in the tool, only suturing was available at all facilities. Additionally, incision & drainage, male circumcision and wound debridement were widely available and provided at 98%, 98% and 92% of facilities, respectively. Caesarean section was available at 67% of facilities.

Equipment was largely inadequate, including a significant gap in availability of functioning anaesthesia machines. Running water and electricity were widely available with only two facilities having no access to either water or electricity. However, only 37.5% of facilities reported both consistent running water and electricity. Greater than half of facilities reported never using eye protection, and 46% reported no access to this critical piece of personal protective equipment. Six facilities had all essential equipment consistently available: Bombo Regional Hospital, Dodoma Regional Hospital, St Francis District Hospital, Ilembula Hospital, Besha Health Centre and Muhimbili National Hospital. Oxygen supplies were inconsistent in many facilities. Twenty facilities (42%) had uninterrupted access to oxygen, with most relying on oxygen concentrators. Fifteen facilities (32%) had no access to an anaesthesia machine of any kind. Of all facilities surveyed, only six pulse oximeters were located. In Tanzania, the regional blood bank system is independent of any hospital facility, and 77% of facilities reported having a blood bank. X-ray was fully functional in 33% of facilities and interrupted in 44%, leaving 23% of facilities with no radiographic capacity. All facilities have access to haemoglobin and urine analysis testing.

Complete results from the evaluation are shown in Table 1. Information was placed into one of four mutually exclusive and comprehensive medical fields. For simplification in Table 1, laboratory tests and other infrastructure (i.e. blood bank, electricity) were included under Equipment.

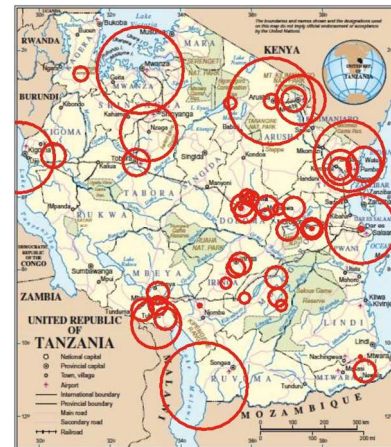

**Figure 1: Facilities evaluated. Ring size proportional to population served.**

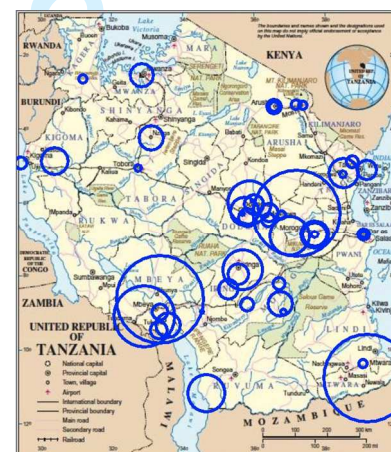

**Figure 2: Rings sized on ratio of (population served : annual procedures). Large rings are underserved.**

Table 1

| <b>General and Congenital</b>              |          |                                        | <b>C</b> | <b>I</b> | <b>N</b> |
|--------------------------------------------|----------|----------------------------------------|----------|----------|----------|
|                                            |          | Blood Bank                             | 29       | 48       | 23       |
| <b>Personnel</b>                           |          | Electricity                            | 44       | 52       | 4        |
| General physician performing surgery       | 113      | Emergency Guidelines                   | 25       | 13       | 63       |
| Non-physicians performing surgery          | 122      | Emergency Room                         | 33       | 15       | 52       |
| Paramedics and midwives                    | 4017     | Generator                              | 58       | 2        | 40       |
| Physicians trained in surgery (specialist) | 64       | Hemoglobin and Urine Analysis          | 96       | 4        | 0        |
|                                            |          | Medical Records                        | 98       | 2        | 0        |
| <b>Procedure</b>                           | <b>P</b> | Running Water                          | 56       | 35       | 8        |
| Appendectomy                               | 69       | Surgery Guidelines                     | 58       | 6        | 35       |
| Biopsy                                     | 81       | Cotton Wool                            | 77       | 21       | 2        |
| Burn care                                  | 90       | Adhesive Tape                          | 96       | 4        | 0        |
| Cataract repair                            | 35       | Apron, plastic, reusable               | 81       | 15       | 4        |
| Cleft lip repair                           | 25       | Bandages sterile                       | 98       | 2        | 0        |
| Congenital hernia repair                   | 71       | Batteries for flashlight               | 58       | 33       | 8        |
| Cystotomy                                  | 63       | Bucket, plastic                        | 94       | 6        | 0        |
| Hernia repair                              | 69       | Capped bottle, alcohol solution        | 79       | 13       | 8        |
| Hydrocele                                  | 88       | Disposable needles # 25, 21,19         | 98       | 2        | 0        |
| Incision & Drainage                        | 98       | Drum for sterile dressings             | 83       | 8        | 8        |
| Laparotomy                                 | 75       | Examination table                      | 90       | 10       | 0        |
| Male circumcision                          | 98       | Eye protection                         | 40       | 15       | 46       |
| Neonatal surgery                           | 35       | Face masks                             | 69       | 25       | 6        |
| Suturing                                   | 100      | Forceps, Kocher                        | 73       | 19       | 8        |
| Tubal Ligation/Vasectomy                   | 71       | Forceps, artery                        | 81       | 10       | 8        |
| Urethral stricture                         | 46       | Gloves (non-sterile)                   | 92       | 8        | 0        |
|                                            |          | Gloves (sterile)                       | 90       | 10       | 0        |
|                                            |          | Kidney dishes, stainless steel         | 88       | 13       | 0        |
|                                            |          | Light source (lamp & flashlight)       | 73       | 17       | 10       |
|                                            |          | Nail brush, scrubbing                  | 85       | 10       | 5        |
|                                            |          | Nasogastric tubes 10 to 16 FG          | 71       | 17       | 13       |
|                                            |          | Needle holder                          | 90       | 10       | 0        |
|                                            |          | Needles, cutting & round               | 94       | 6        | 0        |
|                                            |          | Retractors                             | 77       | 17       | 6        |
|                                            |          | Scalpel handle with blade              | 94       | 4        | 2        |
|                                            |          | Scissors blunt 14 cm                   | 83       | 15       | 2        |
|                                            |          | Scissors straight 12 cm                | 77       | 21       | 2        |
|                                            |          | Sharps disposal container              | 98       | 2        | 0        |
|                                            |          | Sheeting, plastic for exam table       | 65       | 23       | 13       |
|                                            |          | Soap                                   | 98       | 2        | 0        |
|                                            |          | Sterile gauze dressing                 | 96       | 4        | 0        |
|                                            |          | Sterilizer                             | 85       | 13       | 2        |
|                                            |          | Suction pump (manual or electric)      | 96       | 4        | 0        |
|                                            |          | Suture, synthetic absorbable           | 90       | 10       | 0        |
|                                            |          | Syringes 10ml                          | 100      | 0        | 0        |
|                                            |          | Syringes 2ml                           | 100      | 0        | 0        |
|                                            |          | Thermometer                            | 96       | 4        | 0        |
|                                            |          | Towel cloth                            | 85       | 13       | 2        |
|                                            |          | Urinary catheter disposable #12, 14,18 | 58       | 33       | 8        |
|                                            |          | Wash basin                             | 94       | 4        | 2        |
|                                            |          | Waste disposal container               | 98       | 2        | 0        |

C: % of facilities with consistent access

I: % of facilities with intermittent access

N: % of facilities with no access

P: % of facilities which offer the procedure



| <b>Anesthesiology/Airway Management</b>           |          |                                               | <b>C</b> | <b>I</b> | <b>N</b> |
|---------------------------------------------------|----------|-----------------------------------------------|----------|----------|----------|
|                                                   |          | Anesthesia Guidelines                         | 27       | 4        | 69       |
| <b>Personnel</b>                                  |          | Anesthesia Machine                            | 67       | 0        | 33       |
| General practitioners performing anesthesia       | 16       | Blood pressure measuring equipment            | 98       | 2        | 0        |
| Non-physicians performing anesthesia              | 176      | Cricothyroidotomy set                         | 27       | 21       | 52       |
| Physicians trained in anesthesiology (specialist) | 11       | Endotracheal tubes, cuffed sizes 5.5 to 9     | 65       | 8        | 27       |
|                                                   |          | Endotracheal tubes, uncuffed sizes 3.0 to 5.0 | 54       | 19       | 27       |
| <b>Procedure</b>                                  | <b>P</b> | IV cannula sizes 18,22,24                     | 92       | 8        | 0        |
| Airway Foreign Body                               | 83       | IV infusion set                               | 90       | 10       | 0        |
| Cricothyroidotomy                                 | 44       | IV Infusor bags                               | 73       | 10       | 17       |
| General Anesthesia                                | 65       | Laryngoscope handle                           | 71       | 15       | 15       |
| Ketamine IV                                       | 67       | Laryngoscope Macintosh blades (adult)         | 73       | 15       | 13       |
| Regional Anesthesia                               | 42       | Laryngoscope Macintosh blades (paediatric)    | 46       | 21       | 33       |
| Resuscitation                                     | 88       | Magills Forceps (adult)                       | 56       | 27       | 17       |
| Spinal Anesthesia                                 | 77       | Magills Forceps (paediatric)                  | 38       | 23       | 40       |
|                                                   |          | Mask & tubing to connect to oxygen supply     | 46       | 27       | 27       |
|                                                   |          | Oropharyngeal airway (adult)                  | 42       | 35       | 23       |
|                                                   |          | Oropharyngeal airway (paediatric)             | 21       | 23       | 56       |
|                                                   |          | Oxygen Concentrator                           | 75       | 13       | 13       |
|                                                   |          | Oxygen Cylinder                               | 33       | 31       | 35       |
|                                                   |          | Pain management guidelines                    | 25       | 13       | 63       |
|                                                   |          | Post-operative recovery room                  | 29       | 10       | 60       |
|                                                   |          | Pulse oximetry                                | 13       | 4        | 83       |
|                                                   |          | Resuscitator bag valve & mask (adult)         | 67       | 15       | 19       |
|                                                   |          | Resuscitator bag valve & mask (paediatric)    | 38       | 17       | 46       |
|                                                   |          | Scalp vein infusion set                       | 98       | 2        | 0        |
|                                                   |          | Spare bulbs and batteries for laryngoscope    | 44       | 27       | 29       |
|                                                   |          | Stethoscope                                   | 98       | 2        | 0        |
|                                                   |          | Suction catheter sizes 16 Fr                  | 77       | 15       | 8        |
|                                                   |          | Tongue depressor, wooden, disposable          | 83       | 13       | 4        |
| <b>Orthopaedics and Traumatology</b>              |          |                                               | <b>C</b> | <b>I</b> | <b>N</b> |
|                                                   |          | Radiography                                   | 33       | 44       | 23       |
| <b>Procedure</b>                                  | <b>P</b> | Chest tube insertion equipment                | 54       | 25       | 21       |
| Chest tube placement                              | 63       | Splints for arm, leg                          | 63       | 21       | 17       |
| Clubfoot repair                                   | 35       | Tourniquet                                    | 96       | 4        | 0        |
| Contracture release                               | 33       |                                               |          |          |          |
| Debridement                                       | 92       |                                               |          |          |          |
| Fracture management, closed                       | 88       |                                               |          |          |          |
| Fracture management, open                         | 61       |                                               |          |          |          |
| Joint dislocation reduction                       | 92       |                                               |          |          |          |
| Limb amputation                                   | 65       |                                               |          |          |          |
| Osteomyelitis/septic arthritis                    | 63       |                                               |          |          |          |
| <b>Obstetrics/Gynaecology</b>                     |          |                                               | <b>C</b> | <b>I</b> | <b>N</b> |
|                                                   |          | Vaginal speculum                              | 90       | 10       | 27       |
| <b>Personnel</b>                                  |          |                                               |          |          |          |
| Physicians trained in OBGYN (specialists)         | 74       |                                               |          |          |          |
| <b>Procedure</b>                                  | <b>P</b> |                                               |          |          |          |
| Caesarean delivery                                | 67       |                                               |          |          |          |
| Dilation and curettage                            | 77       |                                               |          |          |          |
| Obstetric fistula repair                          | 21       |                                               |          |          |          |

## Discussion

More than five million people die from injuries every year, and many more are left with permanent disabilities. Significant disparities in care exist between high and low income countries for patients with surgically treatable conditions. An estimate of the global burden of surgery showed that only 26% of estimated surgical procedures were performed in low-income countries, despite these countries accounting for 70% of the global population.<sup>2</sup> Of the estimated 536,000 maternal deaths in 2005, developing countries accounted for 99% of these deaths<sup>6</sup>; much of this mortality could be prevented by timely access to emergency and basic surgical services.

The provision of surgical services has historically been neglected in public health programs<sup>7</sup>. It is often assumed that surgery and anaesthesia interventions are expensive, technologically demanding, and can only be delivered in large hospitals and by specialists. However, limiting surgical care to large facilities in developing countries makes it inaccessible to the large segment of the population in decentralized areas. Experience shows that basic surgical services can be cost-effective and safely delivered even in settings with limited resources.<sup>8</sup>

Two studies have examined the cost effectiveness of small hospitals performing basic surgical operations in resource poor settings.<sup>9-10</sup> The cost per DALY averted in each study for all patients seen was US\$10.93 and US\$32.78. Although these studies did not separate surgical from non-surgical patients in calculating cost/DALY, both hospitals had a significant percentage (29%-67%) of surgical diagnoses contributing to the calculation. These costs compare favourably with other primary health interventions in developing countries.<sup>1</sup>

WHO developed the Integrated Management for Emergency and Essential Surgical Care (IMEESC) toolkit which has been implemented in 37 countries including Tanzania in January 2007<sup>5</sup>. Targeted activities to improve surgical capacity have included the formation of a formal 'Surgical Task force' in Tanzania MoHSW, training courses, the adoption of IMEESC toolkit by the Tanzania Surgical Association, and hosting the biennial WHO GIEESC meeting in Dar es Salaam, Tanzania.

The WHO Global Initiative for Emergency and Essential Surgical Care (GIEESC) was established in 2005 as a collaboration of local and international organizations, academia, health authorities and WHO, in response to the recognition of surgery as a critical component of population based health<sup>5</sup>. The research arm of WHO GIEESC developed the WHO situational analysis tool to provide data in surgical care capacity to assist ministries of health in low and middle-income countries for making evidence-based improvements.

This study provides an overview of the capacity for surgical care in 16 regions of Tanzania and demonstrates the significant gaps in infrastructure, human resources, life-saving and disability-preventive surgical interventions, and essential equipment.

Despite the introduction of the WHO program for emergency and essential surgical care in Tanzania in 2007 and the efforts by the Tanzanian MoH& SW to train non-physicians

1  
2  
3 to deliver select surgical services such as caesarean sections, skilled health personnel to  
4 deliver surgical services remain inadequate for a significant portion of the country. This  
5 deficit is most pronounced in the rural areas, where patients travel great distances to  
6 reach health facilities and consequently face significant delays in care.  
7  
8

9  
10 Although most facilities had a functioning operating theatre, fewer than half had  
11 uninterrupted access to oxygen and a third of facilities did not have access to an  
12 anaesthesia machine as is seen in many Sub-Saharan African countries<sup>11</sup>. Significant  
13 improvements in surgical mortality in developed countries have resulted from  
14 improvements in the delivery of safe anaesthesia. The existing gap of safe anaesthesia  
15 services likely limits the availability of life-saving surgeries in Tanzania or results in  
16 significant complications and unnecessary patient suffering when anaesthesia is not  
17 available.  
18

19  
20 Of the 35 basic surgical interventions, many hospitals did not have the capacity to deliver  
21 all of the basic services. As demonstrated in Figure 2, this survey showed that facilities in  
22 the central and southern region had less capacity to provide basic surgical services.  
23 Additionally, the consistent lack of oxygen tubing, pulse oximeters, and paediatric airway  
24 equipment is a significant barrier to the provision of life-saving services in the regions  
25 studied.  
26

27  
28 Delivery of surgical services is dependent on the availability of all components inherent  
29 in a functioning health system. Systematic changes which address human resources,  
30 supplies/equipment, and infrastructure are necessary to improve mortality from surgically  
31 treatable conditions. The benefits of these changes will significantly impact the mortality  
32 of patients with obstetric related emergencies and traumatic injuries, particularly women  
33 and children. However, the efforts made to improve disease-specific surgical  
34 interventions will not have an isolated impact on surgically treatable conditions and meet  
35 the Millennium Development Goals 4, 5 and 6. Systematic changes such as investments  
36 in oxygen and related equipment, and appropriately trained surgical workforce will also  
37 serve to benefit patients suffering from a range of conditions including sepsis,  
38 pneumonia, HIV related conditions, and other infectious diseases.  
39  
40

41  
42 There are several limitations to this survey. First, it provides only a brief overview of the  
43 capacity for surgical care and cannot be used for detailed program planning. Secondly, an  
44 independent observer did not verify the answers provided in the survey by the health  
45 provider or director of the health facilities. Thirdly, it does not capture data from every  
46 first referral health facilities of the country.  
47  
48

49  
50 This survey presents the first snapshot of life-saving surgical services in Tanzania using  
51 the WHO Tool for Situational Analysis to Assess Emergency and Essential Surgical  
52 Care. This snapshot view provides additional evidence that investments in human  
53 resources, essential equipment, and infrastructure are needed to strengthen district  
54 surgical services in Tanzania to benefit rural population. Addressing the unmet need of  
55 surgical (including anaesthesia, obstetrics and trauma) services within existing related  
56 national programs for maternal and child health will strengthen health systems,  
57  
58  
59  
60

1  
2  
3 particularly at the district level.<sup>12</sup> These investments will have the secondary effect of  
4 improving the overall health care system and the treatment of many non-surgical  
5 conditions. Further research is needed to quantify the true burden of surgical disease in  
6 Tanzania and the cost-benefit of specific interventions to improve surgical services.  
7  
8  
9

10 **Acknowledgements:** The following members of GIEESC in Tanzania were instrumental  
11 in obtaining the reported data: Prof. Neboth Mbembati, Prof. Victor Mwafongo, Dr. Paul  
12 Mareale, Dr. Jasper Mbwambo, Dr. Amani Malima, Dr. Mtumwa Ibrahim, Dr Rashid  
13 Mayoka.  
14  
15

16 **Funding Statement:** This research received no specific grant from any funding agency  
17 in the public, commercial or not-for-profit sectors.  
18  
19

20 **Competing Interests:** I declare that the authors have no competing interests as defined  
21 by BMJ Open, or other interests that might be perceived to influence the results and/or  
22 discussion reported in this article.  
23  
24

25 **Disclaimer:** The authors include staff members of the World Health Organization. They  
26 are responsible for the views expressed in this publication and do not necessarily  
27 represent the decisions or stated policy of the World Health Organization.  
28  
29  
30  
31  
32  
33  
34  
35  
36  
37  
38  
39  
40  
41  
42  
43  
44  
45  
46  
47  
48  
49  
50  
51  
52  
53  
54  
55  
56  
57  
58  
59  
60

## References

- 1  
2  
3  
4  
5  
6  
7  
8  
9  
10  
11  
12  
13  
14  
15  
16  
17  
18  
19  
20  
21  
22  
23  
24  
25  
26  
27  
28  
29  
30  
31  
32  
33  
34  
35  
36  
37  
38  
39  
40  
41  
42  
43  
44  
45  
46  
47  
48  
49  
50  
51  
52  
53  
54  
55  
56  
57  
58  
59  
60
- <sup>1</sup> Debas HT, Gosselin R, McCord C, et al. Surgery. In: Jamison D, ed. Disease control priorities in developing countries, 2nd edn. New York: Oxford University Press, 2006: 1245-59.
- <sup>2</sup> Weiser TG, Regenbogen SE, Thompson KD, et al. An estimation of the global volume of surgery: a modeling strategy based on available data. *Lancet* 2008; 372: 139-44.
- <sup>3</sup> *World Health Organization* (Internet site). Geneva: World Health Organization. Available online: <http://www.who.int/countries/tza/en/> [accessed 18 February 2011].
- <sup>4</sup> The National Road Map Strategic Plan to Accelerate Reduction of Maternal, Newborn and Child Deaths in Tanzania 2008-2015. Ministry of Health and Social Welfare, United Republic of Tanzania, 2008.
- <sup>5</sup> *Emergency and essential surgical care* (Internet site). Geneva: World Health Organization. Available online: <http://www.who.int/surgery> [accessed 18 February 2011]
- <sup>6</sup> Maternal mortality in 2005: estimates developed by WHO, UNICEF, UNFPA and the World Bank. Geneva, World Health Organization, 2007 ([http://www.who.int/reproductive-health/publications/maternal\\_mortality\\_2005/mme\\_2005.pdf](http://www.who.int/reproductive-health/publications/maternal_mortality_2005/mme_2005.pdf)).
- <sup>7</sup> Cherian M, Choo S, Wilson I, et al. Building and retaining the neglected anaesthesia health workforce: is it crucial for health systems strengthening through primary health care? *Bull WHO* 2010;88:637-639.
- <sup>8</sup> Laxminarayan R, Mills AJ, Breman JG, et al. Advancement of global health: key messages from the Disease Control Priorities Project. *Lancet*. 2006 Apr 8;367(9517):1193-208.
- <sup>9</sup> Gosselin R, Thind A, Bellardinelli A. Cost/DALY Averted in a Small Hospital in Sierra Leone: What Is the Relative Contribution of Different Services? *World J Surg* 2006; 30: 505–511.
- <sup>10</sup> McCord C, Chowdhury J. A cost-effective small hospital in Bangladesh: what it can mean for emergency obstetric care. *Int J Gynaecol Obstet*. 2003; 81(1): 83-92.
- <sup>11</sup> Belle J, Cohen H, Shindo N, et al. Influenza preparedness in low-resource settings: a look at oxygen delivery in 12 African countries. *J Inf Dev Count* 2010; 4(7):419-424.
- <sup>12</sup> Hedges JP, Mock CN, Cherian MN. The Political Economy of Emergency and Essential Surgery in Global Health. *World J Surg* 2010;34(9):2003-6.



1  
2  
3  
4  
5  
6  
7  
8  
9  
10  
11  
12  
13  
14  
15  
16  
17  
18  
19  
20  
21  
22  
23  
24  
25  
26  
27  
28  
29  
30  
31  
32  
33  
34  
35  
36  
37  
38  
39  
40  
41  
42  
43  
44  
45  
46  
47  
48  
49  
50  
51  
52  
53  
54  
55  
56  
57  
58  
59  
60

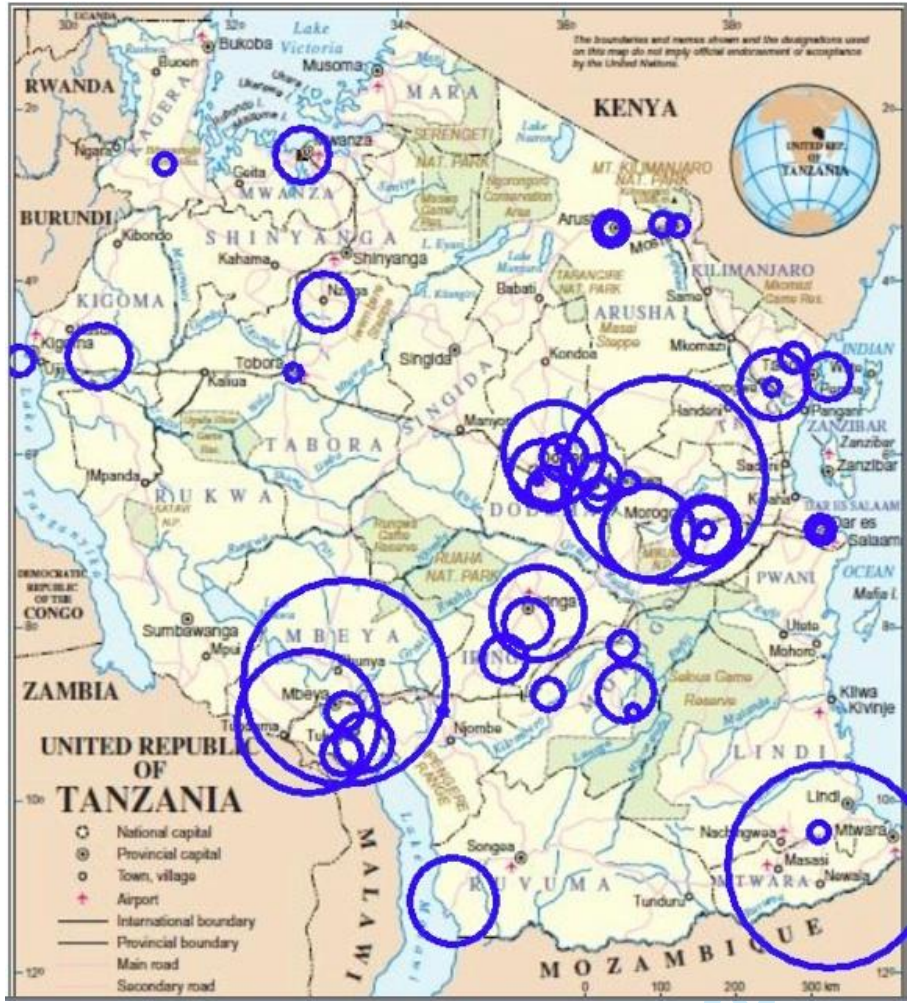

new only



STROBE Statement—Checklist of items that should be included in reports of *cross-sectional studies*

## PAGE NUMBER

Item  
No

## Recommendation

| PAGE NUMBER                    | Item No | Recommendation                                                                                                                                                                                                                                                                                                                                                                                                |
|--------------------------------|---------|---------------------------------------------------------------------------------------------------------------------------------------------------------------------------------------------------------------------------------------------------------------------------------------------------------------------------------------------------------------------------------------------------------------|
| <b>1 Title and abstract</b>    | 1       | (a) Indicate the study's design with a commonly used term in the title or the abstract<br>(b) Provide in the abstract an informative and balanced summary of what was done and what was found                                                                                                                                                                                                                 |
| <b>Introduction</b>            |         |                                                                                                                                                                                                                                                                                                                                                                                                               |
| 2 Background/rationale         | 2       | Explain the scientific background and rationale for the investigation being reported                                                                                                                                                                                                                                                                                                                          |
| 2 Objectives                   | 3       | State specific objectives, including any prespecified hypotheses                                                                                                                                                                                                                                                                                                                                              |
| <b>Methods</b>                 |         |                                                                                                                                                                                                                                                                                                                                                                                                               |
| 3 Study design                 | 4       | Present key elements of study design early in the paper                                                                                                                                                                                                                                                                                                                                                       |
| 3 Setting                      | 5       | Describe the setting, locations, and relevant dates, including periods of recruitment, exposure, follow-up, and data collection                                                                                                                                                                                                                                                                               |
| 3 Participants                 | 6       | (a) Give the eligibility criteria, and the sources and methods of selection of participants                                                                                                                                                                                                                                                                                                                   |
| 3 Variables                    | 7       | Clearly define all outcomes, exposures, predictors, potential confounders, and effect modifiers. Give diagnostic criteria, if applicable                                                                                                                                                                                                                                                                      |
| 3 Data sources/<br>measurement | 8*      | For each variable of interest, give sources of data and details of methods of assessment (measurement). Describe comparability of assessment methods if there is more than one group                                                                                                                                                                                                                          |
| 3 Bias                         | 9       | Describe any efforts to address potential sources of bias                                                                                                                                                                                                                                                                                                                                                     |
| 3 Study size                   | 10      | Explain how the study size was arrived at                                                                                                                                                                                                                                                                                                                                                                     |
| 3 Quantitative variables       | 11      | Explain how quantitative variables were handled in the analyses. If applicable, describe which groupings were chosen and why                                                                                                                                                                                                                                                                                  |
| 3 Statistical methods          | 12      | (a) Describe all statistical methods, including those used to control for confounding<br>(b) Describe any methods used to examine subgroups and interactions<br>(c) Explain how missing data were addressed<br>(d) If applicable, describe analytical methods taking account of sampling strategy<br>(e) Describe any sensitivity analyses                                                                    |
| <b>Results</b>                 |         |                                                                                                                                                                                                                                                                                                                                                                                                               |
| 3 Participants                 | 13*     | (a) Report numbers of individuals at each stage of study—eg numbers potentially eligible, examined for eligibility, confirmed eligible, included in the study, completing follow-up, and analysed<br>(b) Give reasons for non-participation at each stage<br>(c) Consider use of a flow diagram                                                                                                               |
| 3 Descriptive data             | 14*     | (a) Give characteristics of study participants (eg demographic, clinical, social) and information on exposures and potential confounders<br>(b) Indicate number of participants with missing data for each variable of interest                                                                                                                                                                               |
| 4 Outcome data                 | 15*     | Report numbers of outcome events or summary measures                                                                                                                                                                                                                                                                                                                                                          |
| 5-6 Main results               | 16      | (a) Give unadjusted estimates and, if applicable, confounder-adjusted estimates and their precision (eg, 95% confidence interval). Make clear which confounders were adjusted for and why they were included<br>(b) Report category boundaries when continuous variables were categorized<br>(c) If relevant, consider translating estimates of relative risk into absolute risk for a meaningful time period |
| N/A Other analyses             | 17      | Report other analyses done—eg analyses of subgroups and interactions, and sensitivity analyses                                                                                                                                                                                                                                                                                                                |

1  
2  
3  
4  
5  
6  
7  
8  
9  
10  
11  
12  
13  
14  
15  
16  
17  
18  
19  
20  
21  
22  
23  
24  
25  
26  
27  
28  
29  
30  
31  
32  
33  
34  
35  
36  
37  
38  
39  
40  
41  
42  
43  
44  
45  
46  
47  
48  
49  
50  
51  
52  
53  
54  
55  
56  
57  
58  
59  
60

| <b>Discussion</b>        |    |                                                                                                                                                                            |
|--------------------------|----|----------------------------------------------------------------------------------------------------------------------------------------------------------------------------|
| 7 Key results            | 18 | Summarise key results with reference to study objectives                                                                                                                   |
| 7, 8 Limitations         | 19 | Discuss limitations of the study, taking into account sources of potential bias or imprecision. Discuss both direction and magnitude of any potential bias                 |
| 8 Interpretation         | 20 | Give a cautious overall interpretation of results considering objectives, limitations, multiplicity of analyses, results from similar studies, and other relevant evidence |
| 8 Generalisability       | 21 | Discuss the generalisability (external validity) of the study results                                                                                                      |
| <b>Other information</b> |    |                                                                                                                                                                            |
| 9 Funding                | 22 | Give the source of funding and the role of the funders for the present study and, if applicable, for the original study on which the present article is based              |

\*Give information separately for exposed and unexposed groups.

**Note:** An Explanation and Elaboration article discusses each checklist item and gives methodological background and published examples of transparent reporting. The STROBE checklist is best used in conjunction with this article (freely available on the Web sites of PLoS Medicine at <http://www.plosmedicine.org/>, Annals of Internal Medicine at <http://www.annals.org/>, and Epidemiology at <http://www.epidem.com/>). Information on the STROBE Initiative is available at [www.strobe-statement.org](http://www.strobe-statement.org).
